# Lombard effect onset times reveal the speed of vocal plasticity in a songbird

Samuel I. Hardman<sup>a,b</sup>, Sue Anne Zollinger<sup>b</sup>, Klemen Koselj<sup>c</sup>, Stefan Leitner<sup>d</sup>, Rupert C. Marshall<sup>a</sup>, Henrik Brumm<sup>b</sup>

<sup>a</sup> The Institute of Biological, Environmental and Rural Sciences, Aberystwyth University

<sup>b</sup> Communication and Social Behaviour Group and <sup>c</sup> Acoustic and Functional Ecology Group  
and <sup>d</sup> Department of Behavioural Neurobiology, Max Planck Institute for Ornithology,  
Seewiesen

Correspondence: Samuel I. Hardman, Communication and Social Behaviour Group, Max Planck Institute for Ornithology, Seewiesen, 82319, Germany.

Email address: [shardmann@orn.mpg.de](mailto:shardmann@orn.mpg.de)

Phone number: +49 (0)8157 932 350

Keywords: Lombard effect, bird song, amplitude, noise, bioacoustics, response time

**Summary statement:** We measured how quickly canaries are able to adjust the amplitude of their songs to mitigate signal masking by noise and demonstrate rapid vocal plasticity in this species.

## Abstract

Animals that use vocal signals to communicate often compensate for interference and masking from background noise by raising the amplitude of their vocalisations. This response has been termed the Lombard effect. However, despite more than a century of research little is known how quickly animals can adjust the amplitude of their vocalisations after the onset of noise. The ability to respond quickly to increases in noise levels would allow animals to avoid signal masking and ensure their calls continue to be heard, even if they are interrupted by sudden bursts of high amplitude noise. We tested how quickly singing male canaries (*Serinus canaria*) exhibit the Lombard effect by exposing them to short playbacks of white noise and measuring the speed of their responses. We show that canaries exhibit the Lombard effect in as little as 300 ms after the onset of noise and are also able to increase the amplitude of their songs mid-song and mid-phrase without pausing. Our results demonstrate high vocal plasticity in this species and suggest that birds are able to adjust the amplitude of their vocalisations very rapidly to ensure they can still be heard even during sudden changes in background noise levels.

## Introduction

Acoustic communication is often constrained by the effects of background noise, which can mask and degrade acoustic signals, preventing them from being recognized or discriminated by their targeted receivers. To overcome this problem animals may adjust their acoustic signals in a variety of different ways including increasing the duration of brief calls (Brumm et al., 2004), increasing the redundancy of their vocalisations by giving longer and more repetitive call series (Brumm & Slater, 2006; Kaiser & Hammers, 2009), shifting the timing of their vocalisations (Fuller et al., 2007; Vargas-Salinas & Amézquita, 2013), or by increasing the pitch of their vocalisations (Slabbekoorn & Peet, 2003; Parks et al., 2007). One of the most efficient and widespread methods by which animals reduce the impact of signal masking is by raising the amplitude of their vocalisations (Brumm & Zollinger, 2011; Hotchkin & Parks, 2013). This phenomenon has been termed the Lombard effect in honour of its discoverer, the French otolaryngologist Etienne Lombard (Zollinger & Brumm 2011), and it has been shown to be much more effective at increasing signal detectability in noise than either increasing the duration or repetition of a vocalisation (Luo et al., 2015). Moreover, although not always true (Brumm & Zollinger, 2013; Hage et al., 2013), it has been suggested that in some cases increases in the pitch of vocalisations in response to noise may in fact be a by-product of calling more loudly (Osmanski & Dooling, 2009; Schuster et al. 2012).

The Lombard effect has now been shown across a diverse range of taxa including mammals, such as humans, monkeys, cetaceans, and bats (Hotchkin & Parks, 2013) and numerous species of paleognath and neognath birds (Brumm & Zollinger, 2011). The situation in amphibians is still unresolved as one study recently found a noise-dependent regulation of call amplitudes in a frog, (Halfwerk et al., 2015) whereas previous studies failed to find evidence for the Lombard effect in other anuran species (Schwartz & Bee, 2013). Recently, the presence of the Lombard effect was also reported in a fish (Holt & Johnston, 2014) but the data is difficult

to interpret because it is not clear whether and how the noise amplitudes were accounted for in the signal measurements in this study.

The widespread taxonomic distribution of the Lombard effect suggests it is one of the principal mechanisms by which birds and mammals, and perhaps also other vertebrates, improve the detectability of their vocalisations in noise (Brumm & Zollinger, 2011). Furthermore, within these groups it is likely that the Lombard effect occurs independently of learning as in birds it occurs both in species which acquire their vocalisations through vocal production learning (Cynx et al., 1998; Brumm & Todt, 2002) and those that do not (Potash, 1972; Leonard & Horn, 2005; Schuster et al., 2012). Studies of humans also suggest that while the Lombard effect usually occurs involuntarily it may be affected by the social context (Amazi & Garber, 1982; Lu & Cooke, 2008) or linguistic content of the vocalisation (Patel & Schell, 2008), and may also be voluntarily controlled to some extent by cognitive processes (Pick et al., 1989; Tonkinson, 1994).

Evidence for the Lombard effect in animals is extensive. However, with the exception of one study which exposed greater horseshoe bats (*Rhinolophus ferrumequinum*) to short 30 second bursts of white noise (Hage et al., 2013), it has so far only been demonstrated in either wild animals living in continually noisy environments or in captive animals exposed to long periods of synthetic noise (Tab. 1). Early studies of the Lombard effect often used the term “Lombard reflex” (e.g. Egan, 1971; Junqua, 1996), possibly hinting that the Lombard effect is typically exhibited very quickly in response to noise. This was shown in humans by Bauer et al., (2006) who found an onset latency of 157 ms when the amplitude of the auditory feedback of a speaker’s own voice was increased via headphones. Foery (2008) found a similar onset latency of 127 ms in humans exposed to playbacks of noise.

However, despite this and more than a century of research on the subject, only one study has yet directly tested how quickly the Lombard effect can be triggered in a non-human

animal. Hage et al., (2013) found that greater horseshoe bats (*Rhinolophus ferrumequinum*) with their highly specialized auditory orientation system may adjust the amplitude of their echolocation calls as fast as approximately 150 milliseconds, but data on other taxa, and especially on vocalizations used for communication, are still lacking. This omission from the literature is surprising given that many animals are often exposed to sudden changes in noise levels. In undeveloped natural habitats, falling branches, gusts of wind or the calls of con- and heterospecifics are potential sources of intermittent high amplitude noise bursts (Luther & Gentry, 2013). In urban areas peaks in traffic during the morning and evening rush hours contribute to a daily fluctuation in noise levels, while short bursts of often very loud noise from sources such as car alarms, car horns, construction work or passing vehicles are common throughout the day (Warren et al., 2006; Luther & Gentry, 2013).

The ability to rapidly increase the amplitude of their vocalisations would allow animals to avoid signal masking and ensure their calls continue to be heard, even if their vocalisations are interrupted by very sudden bursts of high amplitude noise. This is likely to be particularly important for species whose vocalisations encode information as complex sequences of different elements since masking of any part of these signals may prevent the correct messages from reaching their targeted receivers. For species whose signals encode warnings about threats or predators (e.g. Seyfarth et al., 1980; Templeton et al., 2005) it may be even more important to ensure that they are successfully transmitted. As animal vocalisations are also often used for territory defence and mate attraction (Seyfarth & Cheney, 2003), intermittent masking of these vocalisations may lead to reduced breeding success in some species. The ability to avoid signal masking during sudden bursts of noise is therefore likely to be strongly favoured by selection.

On a proximate level, the Lombard effect demonstrates that the auditory system continuously monitors vocal output and uses this feedback to modulate the sound pressure level of vocalisations according to the strength of the background noise (Eliades & Wang, 2012). The

speed at which the Lombard effect can act is therefore dependent on the neurons of the auditory system, and the speed with which the muscles of the sound producing organ can respond to neuronal stimulation (Suthers & Zollinger, 2008). In mammals the neurons which mediate the Lombard effect seem to be located in the brainstem (Nonaka et al., 1997; Hage et al., 2006) while cortical structures seem to be able to modulate this brainstem-based network (Eliades & Wang, 2012). The ability of humans to voluntarily control the Lombard effect to some degree also points towards some involvement of the motor cortex (Brumm & Zollinger, 2011). These studies suggest that control of the Lombard effect is sophisticated and likely requires well-developed auditory and motor control systems. Understanding how quickly animals are able to exhibit the Lombard effect will provide insight into how these systems function together and may also advance our understanding of the flexibility and plasticity of vocal behaviours in animals.

We addressed this topic in a small passerine bird, the canary (*Serinus canaria*: Linnaeus). Male canaries have diverse and well-studied vocal repertoires that are used in mate attraction and stimulation (e.g. Leitner et al., 2001; Voigt & Leitner, 2008; Leboucher et al., 2012). The use of minibreaths during rapid trills, which allows for uninterrupted songs of very long duration and consisting of long repetitive phrases of the same element type, makes the canary an ideal model to investigate mechanisms of rapid song modulation (Suthers et al., 2012). Furthermore, different aspects of song production and vocal control mechanisms have been studied in this species (e.g. Leitner & Catchpole, 2004; Bolhuis & Gahr, 2006; Suthers et al., 2012), which will eventually allow placing new findings on the mechanisms of vocal plasticity into a broader behavioural physiology context (Elemans et al., 2015). We examined changes in the sound pressure level of the song of canaries during sudden short and sporadic bursts of broadband white noise in order to discover how rapidly they exhibit the Lombard effect.

## Methods

### Animals

Recordings were taken from seven adult male canaries (*Serinus canaria*: Linnaeus) kept under license (license number: Az.: 311.5-5682.1/1-2014-021). One female canary was used to encourage the males to sing. All birds were bred and raised in aviaries at the Max Planck Institute for Ornithology (Seewiesen, Germany). Experiments were performed under a 14:10 light:dark cycle, and constant access to *ad libitum* food and water supplemented with fresh vegetables, cuttlebones and grit.

### Apparatus

Prior to experiments, all male birds were kept together in an aviary (1.95 × 1.0 × 1.8 m). The female was kept in a separate cage (120 × 80 × 60 cm). Recordings were made in a separate aviary (1.95 × 1.0 × 1.8 m) lined with acoustic tiles which was visually and audibly separated from the other birds. During recordings, individual males were placed inside the recording aviary inside a wire cage (60 × 40 × 40 cm) within view of the female (in a separate cage 2 m away). An omnidirectional microphone (Sennheiser ME62) connected to a PC using an external soundcard (Edirol UA-101) and the recording software Sound Analysis Pro (Tchernichovski et al., 2000; version 1.085) were used for all audio recordings. Recordings were made with a sampling rate of 44.1 kHz and 16 bit accuracy. The microphone was placed 60 cm above the centre of the cage, halfway between the two perches, to minimise variation in the recorded sound level caused by lateral movements of the bird's body and head. Recordings were triggered automatically whenever the bird sang using the trigger-record function in Sound Analysis Pro.

To induce the Lombard effect, white noise (0.1 – 16 kHz) was played towards the birds during singing bouts. The noise was broadcast through a JBL Pro III loudspeaker placed 140 cm away from the cage and connected to a Pioneer A109 stereo amplifier. The sound pressure level of the noise was 75 dB (re. 20 μPa) measured from inside the cage at the position of the perches.



A custom Matlab (version 7.5.0; Natick, USA; [www.mathworks.com](http://www.mathworks.com)) routine was used to automatically trigger noise playbacks whenever the sound pressure level and duration of a bird's song crossed a pre-defined trigger threshold. The trigger function was controlled using a microphone (Audio-Technica ATR3350) connected to an external soundcard (Edirol UA25) and the Playrec toolkit for Matlab. Canary song is composed of a succession of phrases which are each formed from long repeats of multiple song elements of the same type (Poulsen, 1959; Nottebohm & Nottebohm, 1978; Supplementary Fig. 1). We set white noise playbacks to begin after a random delay of between 1 - 10 seconds after being triggered to ensure that the noise began during a different phrase and element type in each recording. Playbacks of white noise were always exactly 20 seconds long.

### Analysis

All acoustic analyses were carried out using the software Avisoft-SASLab Pro (version 5.2.09; Specht, 2002). First, different song element types were identified using spectrograms and each song element type was given a number unique to the element type itself and to the bird it came from. Most of the songs in this study began with a few quieter elements (usually around 5-6 elements) before the sound pressure level rapidly increased and stabilised. To prevent these initial quieter elements from affecting our results they were excluded from our analyses and the sound pressure level of song elements was only measured after the point at which the rapid increase in sound pressure level had levelled out. The sound pressure level for each element in both noise ( $n = 2390$ ) and quiet conditions ( $n = 1750$ ) was measured with an averaging time of 10 ms. Per recording an average of  $11.23 (\pm 1.69 \text{ s.e.m.})$  elements were recorded before the onset of noise and  $14.64 (\pm 2.35 \text{ s.e.m.})$  after the onset of noise. In our statistical analyses we only included data for element types which occurred both before and during the onset of noise.

The sound pressure level of the background noise was subtracted from these measurements using the following logarithmic computation procedure given by Brumm & Zollinger (2011) in order to calculate the sound pressure level of the song elements alone ( $L_{\text{signal}}$ ):

$$\text{Eqn 1. } L_{\text{signal}} = 10 \log_{10} \left( 10^{\left( \frac{L_{\text{signal+noise}}}{10} \right)} - 10^{\left( \frac{L_{\text{noise}}}{10} \right)} \right)$$

Where  $L_{\text{signal} + \text{noise}}$  is the sound pressure level of the song element and the background noise and  $L_{\text{noise}}$  is the sound pressure level of the background noise alone.

The software was calibrated by recording a sine tone of constant amplitude using the same microphone and software settings as used for the recordings of birdsong. The sound pressure level of this tone (68 dB, 1000 Hz) was directly measured using a sound pressure level meter (Voltcraft SL-400) at the position of the microphone.

The proportional increase in the sound pressure level (SPL) of song elements in noise was calculated using the equation:

$$\text{Eqn 2. } \text{SPL increase} = \sqrt{2}^{\text{(dB increase/6} \times 2\text{)}}$$

Where *SPL increase* is the proportional increase in the sound pressure level and *dB increase* is the measured increase in dB of a song element.

For every song element sung during noise playbacks we also recorded how many seconds of the noise playback the bird had been exposed to before the element was sung (maximum 20 seconds). With this information we created a subset from our full dataset for song elements sung during the first one second after the onset of noise exposure. These data were used to determine if canaries exhibit the Lombard effect within one second of exposure to noise.

In most of our recordings canaries stopped singing immediately after the noise playback began, before quickly resuming song again in the noise. However, in some cases the canaries continued to sing the same phrase uninterrupted during the quiet period and into the noise

(Fig. 1). From these recordings we created a separate dataset of sound pressure level measurements to test if canaries can adjust the sound pressure level of their songs mid-song and mid-phrase without pausing.

### Statistical analyses

To determine if the Lombard effect occurred within 20 seconds and within one second of the onset of noise, and to determine whether canaries are able to exhibit the Lombard effect mid-phrase without first interrupting their song, we analysed our data using separate generalised linear mixed models (GLMMs) in R (version 3.0.2; R core team, 2013) using the package lme4 (Bates et al., 2015). We modelled the influence of noise exposure (binary fixed factor: present or absent) on the sound pressure level of the song elements (dependent variable) with normally distributed errors and an identity link function. The ID of the birds, the song element code and the recording (the audio file the data were taken from) were all included as random factors. We also included noise as a nested random factor within recordings to account for audio files containing song elements recorded both during quiet and during noise exposure. We assessed the effect of noise exposure on the sound pressure level of canary song by comparing models including noise exposure to null models using likelihood ratio tests with one degree of freedom. Where multiple analyses were carried out on the same dataset Bonferroni corrections were used to account for multiple comparisons.

To more precisely determine the speed of the onset of the Lombard effect we further analysed one exemplary element type from one individual (for which the most data were available) using a broken-line regression model fitted using the segmented package in R (Muggeo, 2008; Muggeo & Adelfio 2010). This allowed us to precisely identify at what time after the onset of noise this element type was sung at a significantly higher sound pressure level than before the noise began.

## Results

In total we measured 4140 song elements from seven birds ( $n = 1750$  before the onset of noise, 2390 during white noise exposure, song element types  $n = 31$ ). The sound pressure level of song from all seven birds was found to be higher during exposure to white noise and this was significant (Fig. 2). Song elements sung during the full 20 seconds of exposure to white noise (including elements from songs which were briefly interrupted at the onset of noise before continuing) had a sound pressure level which was on average 5.3 dB ( $\pm 0.5$  s.e.m.) higher than song elements sung before the onset of noise ( $\chi^2 = 60.166$ , d.f. = 1, Bonferroni corrected  $P < 0.0001$ ). A subset from this dataset including only song elements sung during the first one second of noise exposure ( $n = 636$  before the onset of noise, 38 during white noise exposure, birds  $n = 3$ , song element types  $n = 5$ ) showed that song elements sung during the first one second of noise exposure had a sound pressure level which was on average 4.8 dB ( $\pm 1.4$  s.e.m.) higher than song elements sung before the onset of noise ( $\chi^2 = 9.430$ , d.f. = 1, Bonferroni corrected  $P = 0.004$ ). These results represent increases in sound pressure level of 84 % and 75 % respectively (Fig. 2).

In many of our recordings we found that canaries often briefly stopped singing immediately after the noise playback began. However, in some of our recordings the birds began to sing a song phrase during quiet conditions and continued to sing the same phrase uninterrupted as a noise playback began (Fig. 1;  $n = 159$  elements sung before the onset of noise, 80 during white noise exposure, birds  $n = 4$ , mean phrase length 1.5 s). From these recordings we created a separate dataset which allowed us to test if canaries are able to exhibit the Lombard effect mid-song and mid-phrase without pausing. In these recordings, the sound pressure level of song elements sung during noise exposure was on average 3.3 dB ( $\pm 0.8$  s.e.m.) higher than song elements sung before the onset of noise ( $\chi^2 = 8.940$ , d.f. = 1,  $P = 0.002$ ) representing a 46 % increase in the sound pressure level (Fig. 2).

For the element type analysed using the broken-line regression model we found that the sound pressure level of song elements sung more than 0.318 seconds after the onset of noise was significantly higher ( $P < 0.05$ ) than song elements sung before the onset of noise (Fig. 3).

## Discussion

This is the first study, to our knowledge, to directly test the onset latency of the Lombard effect in a bird and the first to show that the Lombard effect is exhibited by canaries. Our results show that male canaries exhibit the Lombard approximately 300 ms after the onset of noise, and are able to do this mid-song and mid-phrase without pausing. Thus, we show that canaries possess a remarkably fast vocal plasticity which allows them to adjust their vocalisations in real time to mitigate the masking effects of sudden bursts of noise. Given that the Lombard effect is an ancient trait which is likely shared by all extant bird species (Brumm & Zollinger, 2011) it is possible that all vocalising birds exhibit similarly rapid response times. Moreover, while humans exhibit the Lombard effect within 150 ms (Bauer et al., 2006; Foery, 2008), greater horseshoe bats (*Rhinolophus ferrumequinum*) have been shown to increase the sound pressure level of their echolocation calls almost instantaneously when exposed to noise (Hage et al., 2013). These studies suggest that similarly rapid Lombard responses may be present in taxa other than birds.

In recent years numerous studies have identified adjustments to the vocalisations of animals living in noisy environments which help them to mitigate the problem of signal masking (Brumm, 2013). Most of these studies contrast the vocalisations of populations living in noisy and quiet environments and identify differences which may be adaptive. However, it is still not fully understood exactly how these differences arise. Several hypotheses have been proposed, including short term vocal plasticity, long-term ontogenetic vocal adjustments, selective attrition of vocalisations which transmit poorly in noise, passive acquisition of vocalisations which transmit well in noise, and microevolutionary change (Patricelli & Blickley, 2006). The Lombard effect is a clear example of short-term vocal plasticity. The very fast reaction times demonstrated in our study suggests, in combination with the evidence for the perceptual efficiency of the Lombard effect for signal detection in noise (Nemeth & Brumm 2010,

Luo et al., 2015), that vocal plasticity is the key factor allowing animals to cope with the problem of signal masking in environments with unpredictable and fluctuating noise levels.

Studies on the speed of behavioural song plasticity in birds are rare but the available evidence suggest that other song parameters can be modified in response to changes in the environment on different or similar time scales as the one we found for the Lombard effect. House finches (*Carpodacus mexicanus*) have been shown to shift the frequency of their song notes within the time it takes them to sing three songs to avoid masking by high-amplitude noise playbacks (Bermúdez-Cuamatzin et al., 2010), while black-capped chickadees (*Poecile atricapillus*) increase the frequency of their song notes on average after more than one minute to avoid spectral overlap with lower frequency masking tones played back to them (Goodwin & Podos, 2013). In contrast, the onset of singing activity in nightingales (*Luscinia megarhynchos*) can be triggered on average within 0.9 seconds to reduce temporal overlap by heterospecific songs (Brumm, 2006). In duetting bird species, the two partners of a pair may react even faster to integrate their duet parts into one coherent song (Hall, 2009; Tempelton et al., 2013). Thus, the regulation of vocal onset in birds operates on a similar time scale as the Lombard effect, suggesting a similar role for the fast adjustment of signalling in fluctuating environments.

The rapid onset of the Lombard effect also indicates how quickly the auditory system can be integrated with the different motor systems to enable fast vocal plasticity (Bauer et al., 2006). For the Lombard effect to occur, a singing bird first needs to detect an increase in noise and in a second step increase the contraction of abdominal and intercostal muscles to increase bronchial pressure, which eventually leads to an increase in song amplitude (Plummer & Goller, 2008). To stay on pitch during Lombard vocalizations (Templeton et al., 2016), birds need to decouple amplitude from frequency during vocal production, which could be achieved by a reduction of labial tension via the syringeal muscles or a reduction of air pressure in the interclavicular air sac via the respiratory muscles (Elemans et al., 2015).

Our study also sheds light on the question of what the smallest unit of vocal production in birds is. Cynx (1990) approached this question by interrupting the song of zebra finches (*Taeniopygia guttata*) and observing at what point in their songs the birds stopped singing. He found that zebra finches always stopped singing at discrete locations between song elements and never stopped halfway through a song element. That song elements in zebra finches may represent the smallest motor unit of song production was further supported by the discovery of Yu & Margoliash (1996) of precisely timed temporal correlations between discharge patterns in the vocal motor nucleus RA (Robust nucleus of the archipallium) and individual song elements in singing birds. Franz & Goller (2002) later confirmed this result in the peripheral vocal production system, by showing that each song element sung by zebra finches corresponds to a single expiratory pressure pulse from the lungs. Evidence from measurements of peripheral vocal motor patterns in canaries also support the hypothesis that individual elements represent the smallest units of song production in this species. Even in trills with a repetition rate of up to 30 elements per second, canaries take a rapid minibreath between each element, demonstrating that each element in these trills represents a discrete production unit (Suthers & Zollinger, 2008). However, unlike in zebra finches (Yu and Margoliash, 1996), almost nothing is known about the smallest motor units of song production in the canary brain. However, it has been shown that for the majority of canary element types there is a one to one relationship between air-sac compression and the production of individual notes (Hartley, 1990). In our study canaries often interrupted their song almost immediately in response to the sudden onset of noise. As in zebra finches, we observed that canaries always stopped singing at discrete intervals between elements. Our recordings therefore suggest that song elements are also the smallest units of sound production in this species. Furthermore, as repeats of individual syllables in canary song are controlled by the HVC and the song pattern by the RA (Halle et al., 2003), the ability to stop singing so quickly after the onset of noise suggests extremely rapid modulation of this pathway.



In conclusion, our study adds to the growing number of studies which show that animals use the Lombard effect to communicate in to noise. Furthermore, we show for the first time that the Lombard effect can be exhibited extremely rapidly in response to sudden bursts of noise in birds. For animals that live in environments with highly variable and unpredictable background noise this ability is likely to be of particular importance as it would allow them to maintain signal transmission despite sudden changes in noise levels.

## Acknowledgments

We would like to thank the animal caretakers at the Max Planck Institute for caring for the birds during our experiments and our colleagues for the many useful discussions and advice. This project was supported by the German Academic Exchange Service (research grant for doctoral students to S.I.H., grant number 57130104), Aberystwyth University (research scholarship for PhD students to S. I. H.) and the German Research Foundation (grant numbers BR 2309/7-1 and BR 2309/8-1).

**Competing interests:** No competing interests declared

**Author contributions:** S. I. H wrote the manuscript, ran the experiment and contributed to the design of the experiment; H. B. designed the experiment, contributed to the manuscript and to the analysis of sound recordings; S. A. Z. contributed to the design of the experiment, the analysis of sound recordings and to the manuscript; K. K. assisted with statistical analyses and contributed to the design of the experiment and to the manuscript; S. L. provided experimental advice and contributed to the manuscript. R. C. M. provided advice and contributed to the manuscript.

## References

- Amazi, D. K., & Garber, S. R. (1982). The Lombard sign as a function of age and task. *J. Speech Lang. Hear. Res.*, **25**(4), 581-585.
- Bauer, J. J., Mittal, J., Larson, C. R., & Hain, T. C. (2006). Vocal responses to unanticipated perturbations in voice loudness feedback: An automatic mechanism for stabilizing voice amplitude. *J. Acoust. Soc. Am.*, **119**(4), 2363-2371.
- Bermúdez-Cuamatzin, E., Ríos-Chelén, A. A., Gil, D., & Garcia, C. M. (2010). Experimental evidence for real-time song frequency shift in response to urban noise in a passerine bird. *Biol. Lett.*, **7**, 36-38.
- Bolhuis, J. J., & Gahr, M. (2006). Neural mechanisms of birdsong memory. *Nat. Rev. Neurosci.*, **7**(5), 347-357.
- Brumm, H. & Zollinger, S. A. (2013). Avian Vocal Production in Noise. In *Animal Communication and Noise* (ed. H. Brumm), pp.187-227. Heidelberg: Springer-Verlag.
- Brumm, H. (2004). The impact of environmental noise on song amplitude in a territorial bird. *J. Anim. Ecol.*, **73**(3), 434-440.
- Brumm, H. (2006). Signalling through acoustic windows: nightingales avoid interspecific competition by short-term adjustment of song timing. *J. Comp. Physiol. A*, **192**(12), 1279-1285.
- Brumm, H. (ed.) (2013). *Animal Communication and Noise*. Springer, Heidelberg.
- Brumm, H., & Slater, P. J. (2006). Ambient noise, motor fatigue, and serial redundancy in chaffinch song. *Behav. Ecol. Sociobiol.*, **60**(4), 475-481.

Brumm, H., & Todt, D. (2002). Noise-dependent song amplitude regulation in a territorial songbird. *Anim. Behav.*, **63**(5), 891-897.

Brumm, H., & Zollinger, S. A. (2011). The evolution of the Lombard effect: 100 years of psychoacoustic research. *Behaviour*, **148**(11-13), 1173-1198.

Brumm, H., Schmidt, R., & Schrader, L. (2009). Noise-dependent vocal plasticity in domestic fowl. *Anim. Behav.*, **78**(3), 741-746.

Brumm, H., Voss, K., Köllmer, I., & Todt, D. (2004). Acoustic communication in noise: regulation of call characteristics in a New World monkey. *J. Exp. Biol.*, **207**(3), 443-448.

Cynx, J., Lewis, R., Tavel, B., & Tse, H. (1998). Amplitude regulation of vocalizations in noise by a songbird, *Taeniopygia guttata*. *Anim. Behav.*, **56**(1), 107-113.

Douglas Bates, Martin Maechler, Ben Bolker, Steve Walker (2015). Fitting Linear Mixed-Effects Models Using lme4. *J. Stat. Softw.*, **67**(1), 1-48.

Egan, J. J. (1971). The Lombard reflex: Historical perspective. *Arch. Otolaryngol.*, **94**(4), 310-312.

Egnor, S. E. R., & Hauser, M. D. (2006). Noise-induced vocal modulation in cotton-top tamarins (*Saguinus oedipus*). *Am. J. Primatol.*, **68**(12), 1183-1190.

Elemans, C. P. H., Rasmussen, J. H., Herbst, C. T., Düring, D. N., Zollinger, S. A., Brumm, H., Srivastava, K., Svane, N., Ding, M., Larsen, O. N., Sober, S. J. & Švec, J. G. (2015). Universal mechanisms of sound production and control in birds and mammals. *Nat. Comm.*, **6**, 8978.

Eliades, S. J., & Wang, X. (2012). Neural correlates of the Lombard effect in primate auditory cortex. *J. Neurosci.*, **32**(31), 10737-10748.

- Foery, K. R. A., (2008). Triggering the Lombard Effect: Examining Automatic Thresholds, *Master's thesis*, University of Colorado, Boulder, CO.
- Franz, M., & Goller, F. (2002). Respiratory units of motor production and song imitation in the zebra finch. *J. Neurobiol.*, **51**(2), 129-141.
- Fuller, R. A., Warren, P. H., & Gaston, K. J. (2007). Daytime noise predicts nocturnal singing in urban robins. *Biol. Lett.*, **3**(4), 368-370.
- Goodwin, S. E., & Podos, J. (2013). Shift of song frequencies in response to masking tones. *Anim. Behav.*, **85**(2), 435-440.
- Hage, S. R., Jiang, T., Berquist, S. W., Feng, J., & Metzner, W. (2013). Ambient noise induces independent shifts in call frequency and amplitude within the Lombard effect in echolocating bats. *Proc. Nat. Acad. Sci.*, **110**(10), 4063-4068.
- Hage, S. R., Jürgens, U., & Ehret, G. (2006). Audio-vocal interaction in the pontine brainstem during self-initiated vocalization in the squirrel monkey. *Eur. J. Neurosci.*, **23**(12), 3297-3308.
- Halfwerk, W., Lea, A. M., Guerra, M. A., Page, R. A., & Ryan, M. J. (2015). Vocal responses to noise reveal the presence of the Lombard effect in a frog. *Behav. Ecol.*, doi:10.1093/beheco/arv204
- Hall, M. L. (2009). A review of vocal duetting in birds. *Adv. Stud. Behav.*, **40**, 67-121.
- Halle, F., Gahr, M., & Kreutzer, M. (2003). Effects of unilateral lesions of HVC on song patterns of male domesticated canaries. *J. Neurobiol.*, **56**(4), 303-314.
- Hartley, R. S. (1990). Expiratory muscle activity during song production in the canary. *Respir. Physiol.*, **81**(2), 177-187.

Holt, D. E., & Johnston, C. E. (2014). Evidence of the Lombard effect in fishes. *Behav. Ecol.*, **25**(4), 819-826.

Holt, M. M., Noren, D. P., Veirs, V., Emmons, C. K., & Veirs, S. (2009). Speaking up: Killer whales (*Orcinus orca*) increase their call amplitude in response to vessel noise. *J. Acoust. Soc. Am.*, **125**(1), EL27-EL32.

Hotchkin, C., & Parks, S. (2013). The Lombard effect and other noise-induced vocal modifications: insight from mammalian communication systems. *Biol. Rev.*, **88**(4), 809-824.

Junqua, J. C. (1996). The influence of acoustics on speech production: A noise-induced stress phenomenon known as the Lombard reflex. *Speech Comm.*, **20**(1), 13-22.

Kaiser, K, and Hammers, J.L. (2009). The effect of anthropogenic noise on male advertisement call rate in the neotropical treefrog, *Dendropsophus triangulum*. *Behaviour*, **146**(8), 1053-1069.

Kobayasi, K. I., & Okanoya, K. (2003). Context-dependent song amplitude control in Bengalese finches. *Neuroreport*, **14**(3), 521-524.

Leboucher, G., Vallet, E., Nagle, L., Beguin, N., Bovet, D., Halle, F., Tudor, I. D., Mathieu, A. & Kreutzer, M. (2012). Studying female reproductive activities in relation to male song: the domestic canary as a model. *Adv. Stud. Behav.*, **44**, 183-223.

Leitner, S., & Catchpole, C. K. (2004). Syllable repertoire and the size of the song control system in captive canaries (*Serinus canaria*). *J. Neurobiol.*, **60**(1), 21-27.

Leitner, S., Voigt, C., & Gahr, M. (2001). Seasonal changes in the song pattern of the non-domesticated island canary (*Serinus canaria*) a field study. *Behaviour*, **138**(7), 885-904.

- Leonard, M. L., & Horn, A. G. (2005). Ambient noise and the design of begging signals. *Proc. R. Soc. B.*, **272**(1563), 651-656.
- Love, E. K., & Bee, M. A. (2010). An experimental test of noise-dependent voice amplitude regulation in Cope's grey treefrog, *Hyla chrysoscelis*. *Anim. Behav.*, **80**(3), 509-515.
- Lowry, H., Lill, A., & Wong, B. B. (2012). How noisy does a noisy miner have to be? Amplitude adjustments of alarm calls in an avian urban 'adaptee'. *PLoS One*, **7**(1), e29960.
- Lu, Y., & Cooke, M. (2008). Lombard speech: effects of task and noise type. *J. Acoust. Soc. Am.*, **123**(5), 3072-3072.
- Luo, J., Goerlitz, H. R., Brumm, H., & Wiegand, L. (2015). Linking the sender to the receiver: vocal adjustments by bats to maintain signal detection in noise. *Sci. Rep.*, **5**, 18556.
- Luther, D., & Gentry, K. (2013). Sources of background noise and their influence on vertebrate acoustic communication. *Behaviour*, **150**(9-10), 1045-1068.
- Manabe, K., Sadr, E. I., & Dooling, R. J. (1998). Control of vocal intensity in budgerigars (*Melopsittacus undulatus*): differential reinforcement of vocal intensity and the Lombard effect. *J. Acoust. Soc. Am.*, **103**(2), 1190-1198.
- Muggeo, V. M. (2008). Segmented: an R package to fit regression models with broken-line relationships. *R news*, **8**(1), 20-25.
- Muggeo, V. M., & Adelfio, G. (2010). Efficient change point detection for genomic sequences of continuous measurements. *Bioinformatics*, **27**, 161-166.
- Nemeth, E., & Brumm, H. (2010). Birds and anthropogenic noise: are urban songs adaptive?. *The American Naturalist*, **176**(4), 465-475.

- Nemeth, E., Pieretti, N., Zollinger, S. A., Geberzahn, N., Partecke, J., Miranda, A. C., & Brumm, H. (2013). Bird song and anthropogenic noise: vocal constraints may explain why birds sing higher-frequency songs in cities. *Proc. R. Soc. B.*, **280**(1754), 20122798.
- Nonaka, S., Takahashi, R., Enomoto, K., Katada, A., & Unno, T. (1997). Lombard reflex during PAG-induced vocalization in decerebrate cats. *Neurosci. Res.*, **29**(4), 283-289.
- Nottebohm, F., & Nottebohm, M. E. (1978). Relationship between song repertoire and age in the canary, *Serinus canarius*. *Z. Tierpsychol.*, **46**(3), 298-305.
- Osmanski, M. S., & Dooling, R. J. (2009). The effect of altered auditory feedback on control of vocal production in budgerigars (*Melopsittacus undulatus*). *J. Acoust. Soc. Am.*, **126**(2), 911-919.
- Parks, S. E., Clark, C. W., & Tyack, P. L. (2007). Short-and long-term changes in right whale calling behavior: the potential effects of noise on acoustic communication. *J. Acoust. Soc. Am.*, **122**(6), 3725-3731.
- Parks, S. E., Johnson, M., Nowacek, D., & Tyack, P. L. (2011). Individual right whales call louder in increased environmental noise. *Biol. Lett.*, **7**(1), 33-35.
- Patel, R., & Schell, K. W. (2008). The influence of linguistic content on the Lombard effect. *J. Speech Lang. Hear. Res.*, **51**(1), 209-220.
- Patricelli, G. L., & Blickley, J. L. (2006). Avian communication in urban noise: causes and consequences of vocal adjustment. *Auk*, **123**(3), 639-649.
- Pick, H. L., Siegel, G. M., Fox, P. W., Garber, S. R., & Kearney, J. K. (1989). Inhibiting the Lombard effect. *J. Acoust. Soc. Am.*, **85**(2), 894-900.
- Plummer, E. M., & Goller, F. (2008). Singing with reduced air sac volume causes uniform decrease in airflow and sound amplitude in the zebra finch. *Journal of Experimental Biology*, **211**(1), 66-78.

- Potash, L. M. (1972). Noise-induced changes in calls of the Japanese quail. *Psychon. Sci.*, **26**(5), 252-254.
- Poulsen, H. (1959). Song learning in the domestic canary. *Z. Tierpsychol.*, **16**(2), 173-178.
- Pytte, C. L., Rusch, K. M., & Ficken, M. S. (2003). Regulation of vocal amplitude by the blue-throated hummingbird, *Lampornis clemenciae*. *Anim. Behav.*, **66**(4), 703-710.
- R Core Team (2013). R: A language and environment for statistical computing. R Foundation for Statistical Computing, Vienna, Austria. <http://www.R-project.org/>
- Schuster, S., Zollinger, S. A., Lesku, J. A., & Brumm, H. (2012). On the evolution of noise-dependent vocal plasticity in birds. *Biol. Lett.*, **8**(6), 913-916.
- Schwartz, J. J., & Bee, M. A. (2013). Anuran acoustic signal production in noisy environments. In *Animal Communication and Noise* (pp. 91-132). Springer Berlin Heidelberg.
- Seyfarth, R. M., & Cheney, D. L. (2003). Signalers and receivers in animal communication. *Ann. Rev. Psychol.*, **54**(1), 145-173.
- Seyfarth, R. M., Cheney, D. L., & Marler, P. (1980). Monkey responses to three different alarm calls: evidence of predator classification and semantic communication. *Science*, **210**(4471), 801-803.
- Sinnott, J. M., Stebbins, W. C., & Moody, D. B. (1975). Regulation of voice amplitude by the monkey. *J. Acous. Soc. Am.*, **58**(2), 412-414.
- Slabbekoorn, H., & Peet, M. (2003). Ecology: birds sing at a higher pitch in urban noise. *Nature*, **424**(6946), 267-267.
- Specht, R. (2002). Avisoft-SASLab Pro: sound analysis and synthesis laboratory. *Avisoft Bioacoustics, Berlin*.



Suthers, R. A. & Zollinger, S. A. (2008). From brain to song: the vocal organ and vocal tract. In: Zeigler, P. H. & Marler, P. *Neuroscience of Birdsong*. Cambridge: Cambridge University Press. 78-98.

Suthers, R. A., Vallet, E., & Kreutzer, M. (2012). Bilateral coordination and the motor basis of female preference for sexual signals in canary song. *J. Exp. Biol.*, **215**(17), 2950-2959.

Tchernichovski, O., Nottebohm, F., Ho, C. E., Pesaran, B., & Mitra, P. P. (2000). A procedure for an automated measurement of song similarity. *Anim. Behav.*, **59**(6), 1167-1176.

Templeton C.N., Zollinger S.A., & Brumm H. (2016). Traffic noise drowns out great tit alarm calls. *Curr. Biol.* 26: R1173-R1174.

Templeton, C. N., Greene, E., & Davis, K. (2005). Allometry of alarm calls: black-capped chickadees encode information about predator size. *Science*, **308**(5730), 1934-1937.

Templeton, C. N., Mann, N. I., Ríos-Chelén, A. A., Quiros-Guerrero, E., Garcia, C. M., & Slater, P. J. (2013). An experimental study of duet integration in the happy wren, *Pheugopedius felix*. *Anim. Behav.*, **86**(4), 821-827.

Tonkinson, S. (1994). The Lombard effect in choral singing. *J. Voice*, **8**(1), 24-29.

Tressler, J., & Smotherman, M. S. (2009). Context-dependent effects of noise on echolocation pulse characteristics in free-tailed bats. *J. Comp. Physiol. A*, **195**(10), 923-934.

Vargas-Salinas, F., & Amézquita, A. (2013). Traffic noise correlates with calling time but not spatial distribution in the threatened poison frog *Andinobates bombetes*. *Behaviour*, **150**(6), 569-584.

Voigt, C., & Leitner, S. (2008). Seasonality in song behaviour revisited: seasonal and annual variants and invariants in the song of the domesticated canary (*Serinus canaria*). *Hormones and Behavior*, **54**(3), 373-378.

Warren, P. S., Katti, M., Ermann, M., & Brazel, A. (2006). Urban bioacoustics: it's not just noise. *Anim. Behav.*, **71**(3), 491-502.

Yu, A. C., & Margoliash, D. (1996). Temporal hierarchical control of singing in birds. *Science*, **273**(5283), 1871.

Zollinger, S. A., & Brumm, H. (2011). The Lombard effect. *Curr. Biol.*, **21**(16), 614-615.

**Table one.** Duration of noise exposure in studies of the Lombard effect in non-human animals.

| Species                                                                                                          | Context          | Duration of noise exposure (sound pressure level re. 20 $\mu$ Pa unless otherwise stated)                                                                                  | Reference                    |
|------------------------------------------------------------------------------------------------------------------|------------------|----------------------------------------------------------------------------------------------------------------------------------------------------------------------------|------------------------------|
| <b>Birds</b>                                                                                                     |                  |                                                                                                                                                                            |                              |
| Japanese quail ( <i>Coturnix coturnix japonica</i> )                                                             | Captive          | Three hours prior to recordings (48 – 63 dB)                                                                                                                               | Potash (1972)                |
| Zebra finch ( <i>Taeniopygia guttata</i> )                                                                       | Captive          | Until a minimum of five vocalisations had been produced (60 – 90 dB in 5 dB increments)                                                                                    | Cynx et al., (1998)          |
| Budgerigar ( <i>Melopsittacus undulatus</i> )                                                                    | Captive          | Until the bird had produced 75 calls. During the first 25 calls noise was played at 55 dB followed by 70 dB for the second 25 calls and 55 dB again for the last 25 calls. | Manabe et al., (1998)        |
| Common nightingale ( <i>Luscinia megarhynchos</i> )                                                              | Captive          | 20 minutes or until the bird had sung 27 songs, repeated at 5 dB noise increments between 55 – 75 dB                                                                       | Brumm & Todt (2002)          |
| Bengalese finch ( <i>Lonchura striata domestica</i> )                                                            | Captive          | 100 seconds per noise treatment played successively at 40 – 70 dB at 10 dB increments.                                                                                     | Kobayasi & Okanoya (2003)    |
| Blue-throated hummingbird ( <i>Lampornis clemenciae</i> )                                                        | Wild             | Until the bird stopped producing chipping calls (35 and 40 dB)                                                                                                             | Pytte et al., (2003)         |
| Common nightingale ( <i>Luscinia megarhynchos</i> )                                                              | Wild             | Continuous urban noise (40 – 64 dB)                                                                                                                                        | Brumm (2004)                 |
| Tree swallow ( <i>Tachycineta bicolor</i> )                                                                      | Captive and wild | Wild birds – continuous ambient noise (41 – 67 dB)<br>Captive birds – At least one hour (55 and 65 dB)                                                                     | Leonard & Horn (2005)        |
| Domestic fowl ( <i>Gallus gallus</i> )                                                                           | Captive          | Six minutes per treatment with four successive noise treatments (60, 67, 75 and 80 dB)                                                                                     | Brumm et al., (2009)         |
| Budgerigar ( <i>Melopsittacus undulatus</i> )                                                                    | Captive          | Until the bird had produced 60 vocalisations (40 – 90 dB)                                                                                                                  | Osmanski & Dooling (2009)    |
| Noisy miner ( <i>Manorina melanocephala</i> )                                                                    | Wild             | Continuous urban noise (50.83 – 65.80 dB)                                                                                                                                  | Lowry et al., (2012)         |
| Elegant crested tinamou ( <i>Eudromia elegans</i> )                                                              | Captive          | Until the bird had called 12 times (45 and 65 dB in 5 dB increments)                                                                                                       | Schuster et al., (2012)      |
| Atlantic canary ( <i>Serinus canaria</i> )                                                                       | Captive          | 20 second bursts of noise introduced mid-song (75 dB)                                                                                                                      | Current study                |
| <b>Amphibians</b>                                                                                                |                  |                                                                                                                                                                            |                              |
| Cope's grey treefrog ( <i>Hyla chrysoscelis</i> )                                                                | Captive          | Six minutes (40, 50, 60, 70 dB), Lombard absent in this species                                                                                                            | Love & Bee (2010)            |
| Túngara frog ( <i>Physalaemus pustulosus</i> )                                                                   | Captive          | One minute (54 – 94 dB)                                                                                                                                                    | Halfwerk et al., (2015)      |
| <b>Mammals</b>                                                                                                   |                  |                                                                                                                                                                            |                              |
| Crab-eating macaque ( <i>Macaca fascicularis</i> ), and southern pig-tailed macaque ( <i>Macaca nemestrina</i> ) | Captive          | Until 10 vocalisation had been produced at each of five playback levels in ascending and descending intensity (70, 80, 90, 80, 70 dB)                                      | Sinnott et al., (1975)       |
| Common marmoset ( <i>Callithrix jacchus</i> )                                                                    | Captive          | 30 minutes per noise treatment played successively in a random order at 40, 50, 60 and 65 dB.                                                                              | Brumm et al., (2004)         |
| Cotton-top tamarin ( <i>Saguinus oedipus</i> )                                                                   | Captive          | Until 11 calls in both 50 and 70 dB noise had been produced                                                                                                                | Egnor & Hauser (2006)        |
| North Atlantic right whales ( <i>Eubalaena glacialis</i> )                                                       | Wild             | Continuous exposure to environmental noise (92 – 143 dB re: $\mu$ Pa)                                                                                                      | Parks et al., (2011)         |
| Mexican free-tailed bat ( <i>Tadarida brasiliensis</i> )                                                         | Captive          | A minimum of 100 echolocation pulses (55, 65, 75, 85 dB)                                                                                                                   | Tressler & Smotherman (2009) |
| Killer whale ( <i>Orcinus orca</i> )                                                                             | Wild             | Continuous noise exposure from passing ships (approx- 96 – 118 dB re. $\mu$ Pa)                                                                                            | Holt et al., (2009)          |
| Greater horseshoe bat ( <i>Rhinolophus ferrumequinum</i> )                                                       | Captive          | 30 seconds (80, 90, 100 dB)                                                                                                                                                | Hage et al., (2013)          |
| Pale spear-nosed bat ( <i>Phyllostomus discolor</i> )                                                            | Captive          | 28, 40, 52 dB (six minutes)                                                                                                                                                | Luo et al., (2015)           |
| <b>Fish</b>                                                                                                      |                  |                                                                                                                                                                            |                              |
| Blacktail shiner ( <i>Cyprinella venusta</i> )                                                                   | Captive          | 17 minutes to 2.5 hours. Playback noise equivalent to ambient noise levels in nesting sites and 10.2 dB higher than the quiet treatment                                    | Holt & Johnston (2014)       |

## Figures

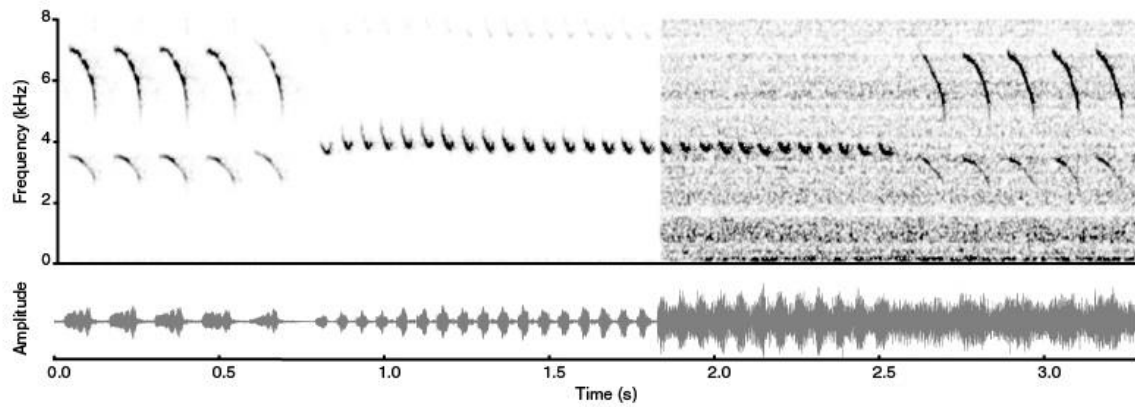

**Figure 1.** Spectrogram showing canary song which began during quiet conditions and continued after noise began.

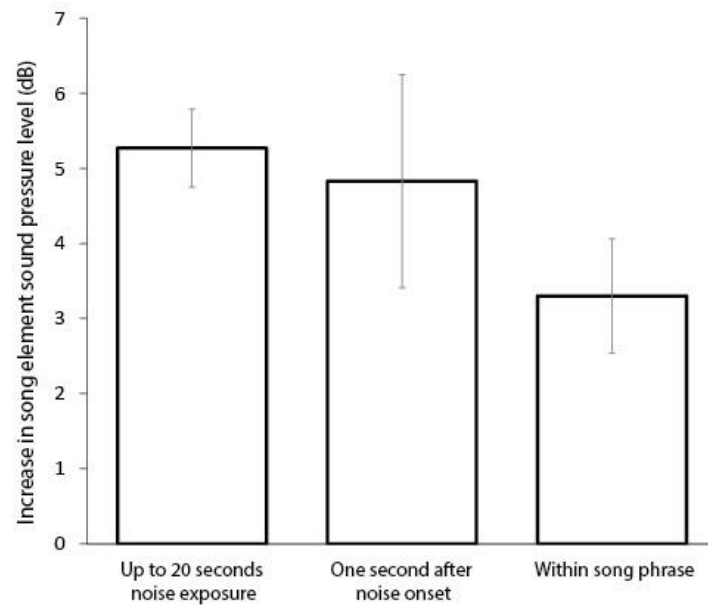

**Figure 2.** Mean ( $\pm$  s.e.m.) increases in the sound pressure level of song elements sung during noise compared to the period before the onset of noise. Graph shows the increase in the sound pressure level of song elements sung up to 20 seconds after the onset of noise exposure, during the first one second of noise exposure and within song phrases which began during the quiet period and continued uninterrupted into the noise. All bars show a significant increase in the sound pressure level of elements sung after the onset of noise when  $P < 0.05$ .

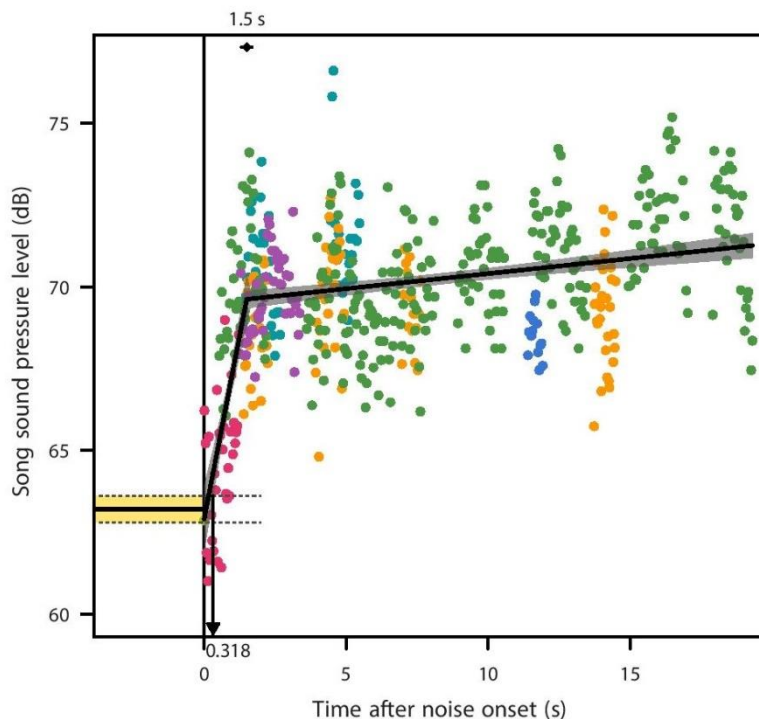

**Figure 3. Sound pressure level of individual song elements before and after the onset of noise.** Data is depicted for one element type (from one individual), which had a high enough repetition rate to give a sufficient sampling size ( $n = 251$  elements measured before the onset of noise; 209 during white noise). Each point depicts a single vocalisation after the onset of noise and different colours show measurements taken from different recordings. The mean sound pressure level of song elements sung in the five seconds before the onset of noise is depicted by a thick line with yellow bands and dashed lines showing the 95 % confidence interval for the mean. The thick line after the onset of noise was fitted using a broken-line regression model and shows the mean sound pressure level of song elements with grey bands showing the 95 % confidence intervals. The onset of the Lombard effect is defined as the point at which the 95 % confidence intervals for elements sung before and after noise no longer overlap and occurred here at 0.318 seconds after the onset of noise (arrow). Elements sung after this time point were significantly louder ( $P < 0.05$ ) than elements sung before the noise began. The initial rapid

increase in the sound pressure level of song elements stopped at 1.5 seconds as shown at the top of the panel. After this point the increase in the sound pressure level slowed markedly.

## Supplementary material

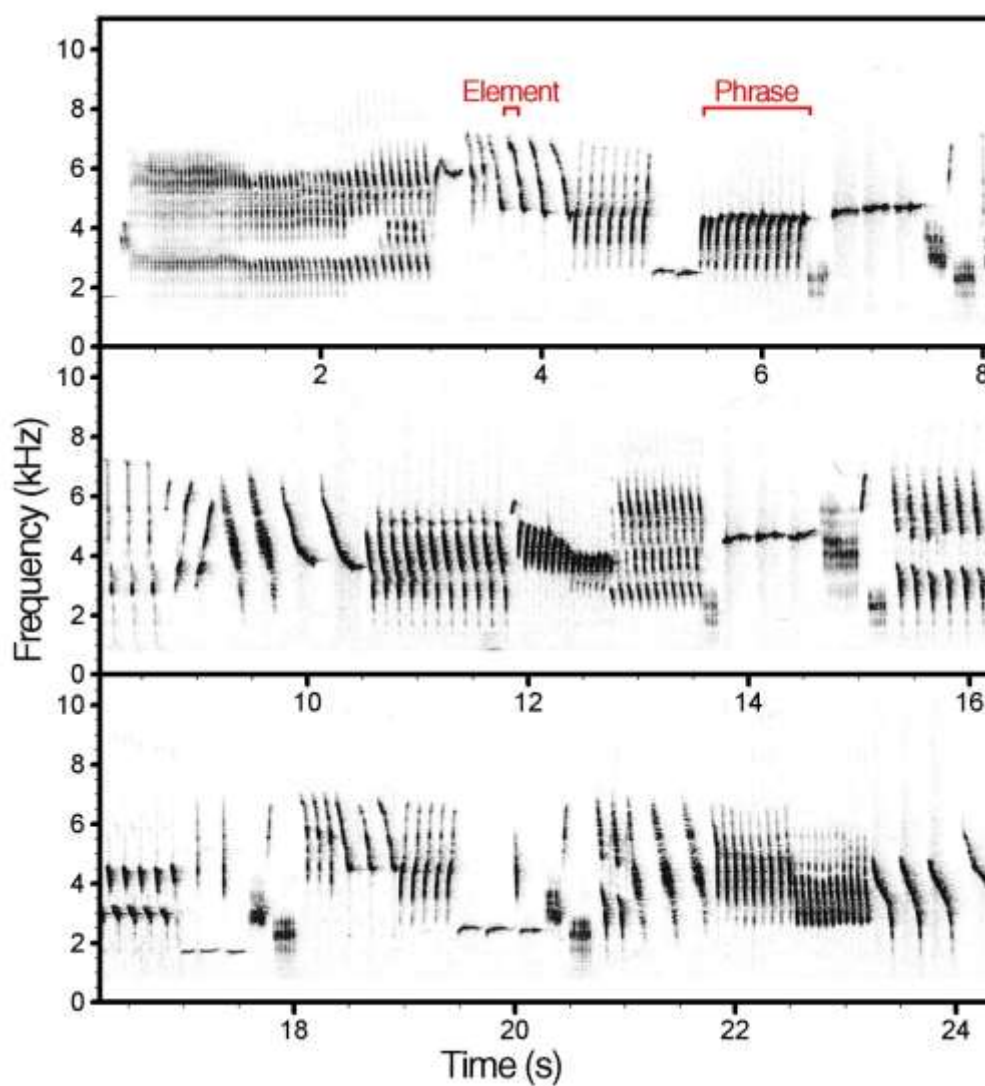

**Supplementary figure 1.** Spectrogram showing a complete canary song with song element and song phrase labelled.



**Supplementary Table 1. Number of song elements and element types recorded per bird.**

| Bird ID | Number of song elements recorded         | Number of different element types recorded |
|---------|------------------------------------------|--------------------------------------------|
| 1       | 851                                      | 1                                          |
| 2       | 765                                      | 5                                          |
| 3       | 798                                      | 8                                          |
| 4       | 259                                      | 6                                          |
| 5       | 335                                      | 4                                          |
| 6       | 361                                      | 1                                          |
| 7       | 771                                      | 6                                          |
|         | <b>Mean: 591.43</b><br><b>Range: 592</b> | <b>Mean: 4.43</b><br><b>Range: 7</b>       |
